# Supplementary material for: Firearms and violence in Europe–A systematic review
Source: PLoS One. 2021 Apr 14;16(4):e0248955. doi: 10.1371/journal.pone.0248955 (PMC8046231; doi:10.1371/journal.pone.0248955)
Supplement: S2 File — (XLSX) [file pone.0248955.s002.xlsx]

## Sheet: Sheet1
Title	Author(s)	Pub_Year	Pub_Type	Journal	Location	Year Data	Study Design	Primary/Secondary Data	Measurement Outcome	Level of Analysis	Aggregated	Sample	Sample comm	Control Group	Source Gun availability	Source Gun Violence	Operationalization Gun Violence	Operationalization Gun Availability	Outcome	OR	Limitations Source
Firearms and Violent Deaths in Europe	Duquet, N. & van Alstein, M.	2015	Report		Austria, Belgium, Bulgaria, Croatia, Cyprus, Czech Republic, Denmark, Estonia, Finland, France, Germany, Hungary, Iceland, Ireland, Italy, Latvia, Lithuania, Luxembourg, FYR Macedonia, Malta, Moldova, Montenegro, Netherlands, Norway, Poland, Portugal, Romania, Serbia, Slovakia, Slovenia, Spain, Sweden, United Kingdom	2007	Quantitative	Secondary	Firearm deaths	Macro	Yes	33 European countries		n/a	Small Arms Survey 2007	WHO European Detailed Homicide Database	Gun related homicide	civilian firearm ownerships, guns per 100 people	strong positive correlation between the gun ownership rate in a country and the rate of firearms-related deaths (including suicide!!) (model 1, R=.527, p=.002). Particularly strong correlation with male victims. Only for the levels of female victims in gunshot homicides was a (barely statistically significant) correlation with gun possession rates found, and this only when the outliers were exclu…
Mixed impact of firearms restrictions on fatal firearm injuries in males: a national observational study	Gjertsen, Finn Leenaars, Antoon Vollrath, Margarete	2014	Journal Article	International Journal of Environmental Research and Public Health	Norway	1969-2009	Natural experiment	Secondary	Firearm Death (ICD 10 W32-34, X93-96, Y22-25,Y35.0+Y36.4)	Individual	No	434 intentional firearm deaths	male deaths due to firearm accidents (158) + homicide (276)	Non-Firearm Deaths	National Law	WHO mortality database	Firearm related accidental and homicidal deaths according to WHO codes	Firearm-restricting regulations	no effect on unintentional deaths in males, significant beneficial change in male homicides after 2003 regulation (no change or increased rates in control group)		Analysis only on males, due to rarity of firearm events including females; no other factors accounted for; increased risk of type 2 errors; 2003 law targeted guards storing weapons at home, thus impact specifically on this group
Does regulation matter? A cross-national analysis of the impact of gun policies on homicide and suicide rates	Hurka & Knill	2018	Journal Article	Regulation & Governance	Austria, Belgium, England and Wales, Denmark, Finland, France, Germany, Greece, Ireland, Italy, Netherlands, Norway, Portugal, Spain, Sweden, Switzerland	1980-2010	Quantitative	Secondary	Firearm Homicide	Macro	Yes	16 West European countries		Total N homicide	Self-constructed Gun Policy Index	WHO mortality database	firearm related homicidal deaths according to WHO codes	Level of Restrictive Gun Policies	more restrictive gun policies are associated with both significantly lower rates of homicide and gun homicide. These effects are both highly significant and robust to the inclusion of control variables
Firearm legislation reform in the European Union: impact on firearm availability, firearm suicide and homicide rates in Austria	Kapusta et al	2007	Journal Article	British Journal of Psychiatry	Austria	1985-2005	Quantitative	Secondary	Growth of firearm-related homicide	Macro	Yes	all homicides and firearm homicides 1985-2005		Firearm Suicides	Official statistics on firearm licenses	Official statistics on firearm homicides	Gun Homicides	Number of firearm licences	negative 2,3% growth of firearm homicide after introduction of firearm restrictive legislation	negative 2, 3% growth per year	firearm licences are underestimation of actual firearms, other factors are not accounted for
The Role of Weapons in Violent Acts: Some results of a Swiss National Cohort Study	Killias, M; Haas, H.	2002	Journal Article	Journal of Interpersonal Violence	Switzerland	1997	Quantitative	Primary	Purposefully inflicted injury on another person	Micro	no	21314 interviews with army recruits		non-army recruits from same age group	Interviews with army recruit	Interviews with army recruit	Purposefully inflicting injury; shot at someone; shot at someone causing injury	Survey question about number of handguns owned, number of rifles owned, frequency of carrying. Weapon	The number of guns and other weapons owned is the most strongly con- tributing factor to the risk of causing intentional injury to someone else. odds ratios are small. However, the presence of every additional handgun (up to a maximum of three as allowed in the ques- tionnaire) increases this risk by more than 60%. Hence, for those who own three or more handguns, the odds ratio is 3.6,		army recruits generally have more experience with weapons, mainly men
Austrian firearm legislation and its effects on suicide and homicide mortality: A natural quasi-experiment amidst the global economic crisis	König et al.	2018	Journal Article	European Psychiatry	Austria	1985-2016	Quantitative	Secondary	Firearm Homicide	Micro	Yes	all homicides and firearm homicides 1985-2016		Firearm suicides	Official statistics on firearm licenses	Official statistics on firearm homicides	Gun related homicide	Firearm licenses	1985–1998 the fraction of firearm homicides among all homicides (calculated as a percentage of firearm homicides within total number of homicides) increased from 4.1% to 9.0%. Following the firearm legislation reform, the fraction of firearm homicides among all homicides decreased to 2.9% in 2008. Thereafter it again increased to 10.4% in 2016.
